# Supplementary material
Source: PubMed Central journal article supplement (PMC3165167)
Supplement: NIHMS88046-supplement-table.pdf [file NIHMS88046-supplement-table.pdf]

**Table S1. MT+ ROI volumes**

| Subject | q(FDR)<0.01 | q(FDR)<0.05 | q(FDR)<0.1 | Size Restricted |
|---------|-------------|-------------|------------|-----------------|
| MM      | 407/878     | 578/1338    | 663/1554   |                 |
| MS      | 854/538     | 984/638     | 1213/1068  |                 |
| C1      | 228/618     | 258/634     | 340/790    |                 |
| C2      | 507/774     | 740/1376    | 1265/2366  |                 |
| C3      | 241/515     | 471/753     | 600/879    |                 |
| C4      | 1395/1444   | 1679/1862   | 1827/2085  | 698/776         |
| C5      | 1368/925    | 1698/1009   | 2656/1745  | 854/688         |
| C6      | 2428/1663   | 2636/1875   | 2899/2451  | 846/689         |

MT+ ROI volumes (in mm<sup>3</sup>) over a range of thresholds used to define the MT+ ROI in the left and right hemispheres (L/R) in sight-recovery subjects MM and MS and in control subjects of Experiment 1. ROI volumes of MM and MS were within the range found in our control subjects. Three of the control subjects (C4, C5, C6) had substantially larger ROIs. In a control analysis (last column), thresholds were further restricted in those three subjects to limit the ROI size to be no larger than the average MT+ ROI size in sight-recovery subjects at q(FDR)<0.05 (877 mm<sup>3</sup>).
